# Supplementary material
Source: PubMed Central journal article supplement (PMC2687589)
Supplement: supp_136_3_403__4.pdf [file supp_136_3_403__4.pdf]

| Table S1. Quantification of effect of MOs, mutants and drug treatments |                                          |                                                    |                                       |                               |                                                            |                               |                                                      |
|------------------------------------------------------------------------|------------------------------------------|----------------------------------------------------|---------------------------------------|-------------------------------|------------------------------------------------------------|-------------------------------|------------------------------------------------------|
| Figure number and panel                                                | Assay                                    | Control                                            | <i>myf5</i> MO                        | <i>myod</i> MO                | <i>myog</i> MO                                             | <i>myf5</i> + <i>myod</i> MOs |                                                      |
| Fig. 1-left                                                            | <i>smyhc1</i> mRNA, 15s                  | an0/47 (0%)                                        | an0/15 (0%)                           | d18/18 (100%)                 | an0/20 (0%)                                                | ab22/25 (88%)                 |                                                      |
| Fig. 1-left                                                            | <i>actin</i> mRNA, 15s                   | an0/57 (0%)                                        | an0/53 (0%)                           | an0/66 (0%)                   | an0/19 (0%)                                                | sr36/41 (88%)                 |                                                      |
| Fig. 1-left                                                            | <i>tpma</i> mRNA, 15s                    | an0/50 (0%)                                        | an0/21 (0%)                           | an0/21 (0%)                   | an0/15 (0%)                                                | sr13/16 (81%)                 |                                                      |
| Fig. 1-left                                                            | slow MyHC IHC, 15s                       | an0/40 (0%)                                        | w6/52 (12%)                           | d46/49 (94%)                  | an0/40 (0%)                                                | ab31/35 (89%)                 |                                                      |
| Fig. 1-right                                                           | <i>myf5</i> mRNA, 15s                    | an0/54 (0%)                                        | s27/27 (100%)                         | an0/40 (0%)                   | an0/40 (0%)                                                |                               |                                                      |
| Fig. 1-right                                                           | <i>myod</i> mRNA, 15s                    | an0/50 (0%)                                        | an0/28 (0%)                           | s39/41 (95%)                  | an0/40 (0%)                                                |                               |                                                      |
| Fig. 1-right                                                           | <i>mrf4</i> mRNA, 15s                    | an0/41 (0%)                                        | w12/18 (33%)                          | an0/34 (0%)                   | an0/36 (0%)                                                |                               |                                                      |
| Fig. 1-right                                                           | <i>myog</i> mRNA, 15s                    | an0/48 (0%)                                        | an0/29 (0%)                           | r28/33 (85%)                  | s28/36 (78.8%)                                             |                               |                                                      |
|                                                                        |                                          | <i>myf5</i> <sup>hu2022</sup> incross              |                                       |                               |                                                            |                               |                                                      |
| Fig. 2D                                                                | <i>myf5</i> mRNA, 15s                    | n6/28 (21%),<br>w13/28 (46%),<br>vw9/28 (32%)      |                                       |                               |                                                            |                               |                                                      |
| Fig. 2E-left                                                           | <i>myog</i> mRNA, 5s                     | sr15/49 (30.6%)                                    |                                       |                               |                                                            |                               |                                                      |
| Fig. 2E-right                                                          | <i>myf5</i> mRNA, 10s<br>+ <i>myog</i>   | vw20/74 (27%)<br>r20/74 (27%)                      |                                       |                               |                                                            |                               |                                                      |
|                                                                        |                                          | Control                                            | <i>myf5</i> <sup>hu2022</sup> incross | <i>myod</i> MO                | <i>myf5</i> <sup>hu2022</sup> incross +<br><i>myod</i> MO  | <i>myog</i> MO                | <i>myf5</i> + <i>myod</i> MO                         |
| Fig. 3B                                                                | <i>myf5</i> mRNA, 13s<br>+ <i>mef2ca</i> |                                                    |                                       |                               | vw7/34 (21%)<br><i>myf5</i><br>sr <i>mef2ca</i>            |                               |                                                      |
| Fig. 3B                                                                | <i>prdm1</i> mRNA +<br>MyHC IHC, 15s     | an0/32 (0%)<br><i>prdm1</i><br>an0/32 (0%)<br>MyHC |                                       |                               |                                                            |                               | an0/61 (0%)<br><i>prdm1</i><br>sr58/61 (95%)<br>MyHC |
| Fig. 3B                                                                | <i>myf5</i> mRNA, 13s<br>+ <i>prdm1</i>  |                                                    |                                       |                               | vw8/31 (26%)<br><i>myf5</i><br>an0/31 (0%)<br><i>prdm1</i> |                               |                                                      |
| Fig. 3B                                                                | <i>myf5</i> mRNA, 13s<br>+ <i>ptc1</i>   |                                                    |                                       |                               | vw5/23 (22%)<br><i>myf5</i><br>an0/23 (0%)<br><i>ptc1</i>  |                               |                                                      |
| Fig. 3B                                                                | <i>smyhc1</i> mRNA, 15s                  |                                                    | an0/87 (0%)                           |                               | ab29/96 (30%)                                              |                               |                                                      |
| Fig. 3B                                                                | <i>actin</i> mRNA, 15s                   |                                                    | an0/99 (0%)                           |                               | ab8/46 (17%)                                               |                               |                                                      |
| Fig. 3B                                                                | <i>tpma</i> mRNA, 15s                    |                                                    | an0/97 (0%)                           |                               | ab15/67 (22%)                                              |                               |                                                      |
| Fig. 3C                                                                | MyHC IHC,<br>80hpf (cranial)             | an0/24 (0%)                                        | an0/40 (0%)                           | sr20/22 (91%)                 | sr31/34 (91%)                                              |                               |                                                      |
| Fig. 3C                                                                | <i>myhz1</i> mRNA,<br>72hpf (cranial)    | an0/35 (0%)                                        | an0/30 (0%)                           | sr10/24 (42%)<br>r14/24 (58%) |                                                            | r15/18 (83%)                  |                                                      |
| Fig. 3D                                                                | <i>myog</i> mRNA,<br>48hpf (cranial)     | an0/17 (0%)                                        | an0/49 (0%)                           | sr13/21 (62%)<br>r6/21 (29%)  |                                                            |                               |                                                      |
| Fig. 3E                                                                | MyHC IHC,<br>80hpf (fin)                 | an0/24 (0%)                                        | an0/40 (0%)                           | sr12/22 (55%)<br>r8/22 (36%)  | 25/34 (sibs):<br>sr12/25 (48%)                             |                               |                                                      |

|         |                                            |             |                                                           |                                       |                                                                          |                                                               |                                                                                             |                                                           |
|---------|--------------------------------------------|-------------|-----------------------------------------------------------|---------------------------------------|--------------------------------------------------------------------------|---------------------------------------------------------------|---------------------------------------------------------------------------------------------|-----------------------------------------------------------|
|         |                                            |             |                                                           |                                       | r10/25 (40%)<br>9/34 (muts')<br>sr9/9 (100%)                             |                                                               |                                                                                             |                                                           |
| Fig. 3E | <i>myog</i> mRNA,<br>48hpf (fin)           | an0/17 (0%) | an0/15 (%)                                                | 11/21 (52.3%)<br>(5/21-mild)          |                                                                          |                                                               |                                                                                             |                                                           |
| Fig. 3E | <i>lhx2</i> mRNA,<br>48hpf (fin)           | an0/52 (0%) | an0/20 (0%)                                               | an1/49 (2%)                           | an0/45 (0%)                                                              |                                                               |                                                                                             |                                                           |
| Fig. 3F | <i>myf5</i> mRNA, 15s<br>+ <i>hsp90a</i>   |             | vw11/37 (30%)<br><i>myf5</i> , d <i>hsp90a</i>            |                                       | vw3/15 (20%)<br><i>myf5</i> sr <i>hsp90a</i>                             |                                                               |                                                                                             |                                                           |
| Fig. 3F | <i>myf5</i> mRNA, 15s<br>+ <i>meox1</i>    |             | vw5/19(26%)<br><i>myf5</i><br>sr0/19 (0%)<br><i>meox1</i> |                                       | vw9/29 (31%)<br><i>myf5</i><br>sr0/29 (0%)<br><i>meox1</i>               |                                                               |                                                                                             |                                                           |
|         |                                            | Control     | <i>myf5</i> MO                                            | <i>myod</i> MO                        | <i>myog</i> MO                                                           | <i>myf5</i> + <i>myod</i> MOs                                 | <i>myf5</i> <sup>hu2022</sup> incross                                                       | <i>myf5</i> <sup>hu2022</sup> incross +<br><i>myod</i> MO |
| Fig. 4A | <i>myog</i> mRNA,<br>10s                   | an0/20 (0%) |                                                           |                                       |                                                                          | ab20/21 (95%)                                                 |                                                                                             |                                                           |
| Fig. 4A | <i>myog</i> mRNA,<br>20s                   | an0/30 (0%) |                                                           |                                       |                                                                          | sr24/27 (89%)                                                 |                                                                                             |                                                           |
| Fig. 4B | MyHC IHC,<br>24hpf                         | an0/21 (0%) |                                                           | r15/15 (100%)                         |                                                                          | sr34/38 (89%)                                                 | an0/41 (0%)                                                                                 | r24/36 (67%)<br>sr12/36 (33%)                             |
| Fig. 4C | Slow + fast<br>MyHC IHC,<br>24hpf          | an0/25 (0%) |                                                           |                                       |                                                                          | sr17/19 (89%),<br>fast ab14/19<br>(73%) sr4/19<br>(21%), slow |                                                                                             |                                                           |
|         |                                            | Control     | <i>myod</i> MO                                            | <i>myf5</i> <sup>hu2022</sup> incross | <i>myf5</i> <sup>hu2022</sup> incross +<br><i>myod</i> MO                | <i>myf5</i> <sup>hu2022</sup> incross+<br><i>myf5</i> MO      | <i>myf5</i> <sup>hu2022</sup> incross +<br><i>myf5</i> + <i>myod</i> MOs                    |                                                           |
| Fig. 4D | <i>myhz1</i> mRNA,<br>24hpf                | an0/49 (0%) |                                                           | an0/104 (0%)                          | r87/117 (74%)<br>sr30/117 (26%)                                          | an0/37 (0%)                                                   | sr41/41 (100%)                                                                              |                                                           |
| Fig. 4D | <i>tpma</i> mRNA,<br>24hpf                 |             |                                                           | an0/28 (0%)                           | r31/43 (72%)<br>sr12/43 (28%)                                            |                                                               |                                                                                             |                                                           |
| Fig. 4D | <i>mylz2</i> + <i>myog</i><br>mRNA, 24hpf  |             |                                                           | an0/26 (0%)                           | r26/30 (87%)<br>sr4/30 (13%)                                             |                                                               |                                                                                             |                                                           |
| Fig. 4D | <i>mylz2</i> + <i>myog</i><br>mRNA, 20s    | an0/57 (0%) | r33/33 (100%)                                             | an0/64 (0%)                           | r35/44 (79%)<br>sr9/34 (21%)                                             |                                                               |                                                                                             |                                                           |
|         |                                            | Control     | <i>myf5</i> MO                                            | <i>myod</i> MO                        | <i>myog</i> MO                                                           | <i>myf5</i> <sup>hu2022</sup> incross                         | <i>myf5</i> <sup>hu2022</sup> incross +<br><i>myod</i> MO                                   |                                                           |
| Fig. 4E | <i>mef2d</i> mRNA,<br>15-16s               | an0/20 (0%) |                                                           | r18/20 (90%)                          |                                                                          | an0/49 (0%)                                                   | r35/43 (81%)<br>sr8/43 (19%)                                                                |                                                           |
| Fig. 4E | <i>mef2d</i> mRNA,<br>22s                  | an0/56 (0%) | an0/13 (0%)                                               | r19/19 (0%)                           | w12/12 (100%)                                                            |                                                               |                                                                                             |                                                           |
|         |                                            | Control     | <i>myf5</i> + <i>myod</i> MOs                             | <i>mrf4</i> <sup>hu2041</sup> incross | <i>mrf4</i> <sup>hu2041</sup> incross +<br><i>myf5</i> + <i>myod</i> MOs | <i>myf5</i> <sup>hu2022</sup> incross                         | <i>myf5</i> <sup>hu2022</sup> incross +<br><i>myod</i> MO                                   |                                                           |
| Fig. 5C | <i>myog</i> mRNA,<br>22s + <i>mrf4</i>     | an0/14 (0%) | sr16/19 (84%)<br><i>myog</i><br>ab <i>mrf4</i>            |                                       |                                                                          | an0/45 (0%)                                                   | sr13/37(35%)<br><i>myog</i><br>ab <i>mrf4</i> ;<br>r24/37(65%)<br><i>myog</i> , <i>mrf4</i> |                                                           |
| Fig. 5C | <i>myog</i> mRNA,<br>+ <i>mrf4</i> , 24hpf |             |                                                           |                                       |                                                                          | an0/12 (0%)                                                   | sr8/27(29%)<br><i>myog</i><br>sr <i>mrf4</i> ; r19/27<br>(71%) <i>myog</i> ,                |                                                           |

|          |                                                |                                                            |                      |                                                                                |                                                       |                                                                                                 | <i>mrf4</i>                                                  |                               |
|----------|------------------------------------------------|------------------------------------------------------------|----------------------|--------------------------------------------------------------------------------|-------------------------------------------------------|-------------------------------------------------------------------------------------------------|--------------------------------------------------------------|-------------------------------|
| Fig. 5D  | <i>myhz1</i> mRNA, 24hpf                       | an0/26 (0%)                                                | sr24/26 (92%)        | w1/20 (5%)                                                                     | sr23/25 (92%)                                         |                                                                                                 |                                                              |                               |
|          |                                                | Control                                                    | <i>myod</i> MOs      | <i>myod</i> + <i>myog</i> MOs                                                  | <i>myf5<sup>hu2022</sup></i> incross                  | <i>myf5<sup>hu2022</sup></i> incross + <i>myod</i> + <i>myog</i> MOs                            | <i>myf5<sup>hu2022</sup></i> incross + <i>myog</i> MOs       | <i>myog</i> MOs               |
| Fig. 6A  | <i>mylz2</i> + <i>smyhc1</i> mRNA, 24hpf       | an0/21 (0%)                                                |                      | sr14/14 (100%)<br><i>mylz2</i><br>an0/14 (0%)<br><i>smyhc1</i>                 | an0/20 (0%)                                           | sr,n16/24 (67%)<br><i>mylz2</i> , <i>smyhc1</i><br>ab8/24 (33%)<br><i>mylz2</i> , <i>smhyc1</i> |                                                              |                               |
| Fig. 6B  | <i>myhz1</i> mRNA, 24hpf                       |                                                            |                      |                                                                                | an0/23 (0%)                                           |                                                                                                 | an0/23 (0%)                                                  |                               |
| Fig. 6B  | <i>smyhc1</i> mRNA, 24hpf                      |                                                            |                      |                                                                                | an0/53 (0%)                                           |                                                                                                 | an0/67(0%)                                                   |                               |
| Fig. 6C  | Tg(acta1: GFP)/slow MyHC/Mef2 IHC, 24hpf       | an0/29 (0%)                                                | r15/15 (100%)<br>GFP | 3sr0/30 (100%)<br>GFP, Mef2 (in fast)                                          |                                                       |                                                                                                 |                                                              |                               |
| Fig. 6D  | fast MyHC IHC, 24hpf                           | an0/20 (0%)                                                | r15/18 (83%)         | sr13/16 (81%)                                                                  |                                                       |                                                                                                 |                                                              | an0/17 (0%)                   |
| Fig. 6E  | <i>myhz1</i> mRNA, 24hpf                       |                                                            |                      | 1 ng each MO<br>-r43/52 (82%)<br>2 ng each MO<br>-r8/23 (35%)<br>sr13/23 (56%) |                                                       |                                                                                                 |                                                              |                               |
|          |                                                | Control                                                    | <i>myod</i> MO       | <i>myf5<sup>hu2022</sup></i> incross                                           | <i>myf5<sup>hu2022</sup></i> incross + <i>myod</i> MO | <i>myf5<sup>hu2022</sup></i> incross + CyA*                                                     | <i>myf5<sup>hu2022</sup></i> incross + <i>myod</i> MO + CyA* | <i>myod</i> + <i>myog</i> MOs |
| Fig. 7A  | <i>myhz1</i> mRNA, 24hpf                       |                                                            |                      | an0/20 (0%)                                                                    | r22/30 (73%)<br>sr8/30 (27%)                          | sl30/30 (100%)                                                                                  | r,sl28/37 (76%)<br>ab9/37 (24%)                              |                               |
| Fig. 7B  | <i>eng1a</i> mRNA, 26hpf                       | an0/23 (0%)                                                | an0/24 (0%)          | an0/32 (0%)                                                                    | ab7/42 (17%)                                          |                                                                                                 |                                                              |                               |
| Fig. 7B  | <i>eng2a</i> mRNA, 23s + <i>myf5</i>           |                                                            |                      | vw7/28 (25%)<br><i>myf5</i><br>an0/28 (0%)<br><i>eng2a</i>                     | r6/12 (50%)<br>ab6/12 (50%)                           |                                                                                                 |                                                              |                               |
| Fig. 7B  | <i>eng1a</i> mRNA, 23s                         | an0/16 (0%)                                                |                      |                                                                                |                                                       |                                                                                                 |                                                              | vw1/19 (5%)                   |
| Fig. 7B  | <i>eng2a</i> mRNA, 23s                         | an0/17 (0%)                                                |                      |                                                                                |                                                       |                                                                                                 |                                                              | ab23/27 (85%)                 |
| Fig. 7C  | Tg ( <i>mylz2:GFP</i> ) + Engrailed IHC, 24hpf | an0/31 (0%)                                                | r35/37 (95%)         |                                                                                |                                                       |                                                                                                 |                                                              |                               |
|          |                                                | <i>myf5<sup>hu2022</sup></i> incross                       |                      |                                                                                |                                                       |                                                                                                 |                                                              |                               |
| Fig. S2C | <i>myf5</i> mRNA, 13s + <i>myod</i>            | vw14/57 (25%)<br><i>myf5</i><br>an0/57 (0%)<br><i>myod</i> |                      |                                                                                |                                                       |                                                                                                 |                                                              |                               |
| Fig. S2C | <i>myf5</i> mRNA, 13s + <i>myog</i>            | vw12/57 (21%)<br><i>myf5</i><br>an0/57 (0%)<br><i>myog</i> |                      |                                                                                |                                                       |                                                                                                 |                                                              |                               |
| Fig. S2C | <i>myf5</i> mRNA, 13s + <i>mrf4</i>            | vw6/28 (21%)<br><i>myf5</i>                                |                      |                                                                                |                                                       |                                                                                                 |                                                              |                               |

|          |                                          |                                                              |                                                |  |  |  |  |
|----------|------------------------------------------|--------------------------------------------------------------|------------------------------------------------|--|--|--|--|
|          |                                          | an0/28 (0%)<br><i>mrf4</i>                                   |                                                |  |  |  |  |
| Fig. S2C | <i>myf5</i> mRNA, 13s<br>+ <i>pax3</i>   | vw9/33 (27%)<br><i>myf5</i><br>an0/28 (0%)<br><i>pax3</i>    |                                                |  |  |  |  |
| Fig. S2C | <i>myf5</i> mRNA, 13s<br>+ <i>mef2ca</i> | vw10/38 (26%)<br><i>myf5</i><br>an0/38 (0%)<br><i>mef2ca</i> |                                                |  |  |  |  |
| Fig. S2C | <i>myf5</i> mRNA, 13s<br>+ <i>prdm1</i>  | vw8/31 (26%)<br><i>myf5</i><br>an0/31 (0%)<br><i>prdm1</i>   |                                                |  |  |  |  |
| Fig. S2C | <i>myf5</i> mRNA, 13s<br>+ <i>ptc1</i>   | vw4/15 (27%)<br><i>myf5</i><br>an0/15 (0%)<br><i>ptc1</i>    |                                                |  |  |  |  |
|          |                                          | <i>mrf4</i> mRNA (100<br>pg)                                 | <i>mrf4</i> <sup>hu2041</sup> mRNA<br>(100 pg) |  |  |  |  |
| Fig. S3B | MyHC, 24hpf                              | em13/17 (76%)                                                | em0/28 (0%)                                    |  |  |  |  |

IHC, immunohistochemistry; CyA, cyclopamine; an, abnormal; r, reduced; sr, strongly reduced; w, weaker; vw, very weak; d, delayed; s, stronger; ab, abolished; sl, smu-like.  
Fig. 1, fraction of embryos with abnormal (an), delayed (d), strongly reduced (sr), abolished (ab), stronger (s) or weaker (w) levels of expression in the somites.  
Fig. 2D, fraction of embryos with normal (n), weak (w) or very weak (vw) *myf5* mRNA levels.  
Fig. 2E-left, fraction of embryos with strongly reduced or absent (sr) *myog* mRNA levels in adaxial cells.  
Fig. 2E-right, fraction of embryos with delayed (d) *myog* mRNA levels in fast precursors.  
Fig. 3B, fraction of embryos from a *myf5*<sup>hu2022</sup> incross injected with *myod* MO with very weak (vw) *myf5* mRNA levels and/or abolished (ab), strongly reduced (sr) or abnormal (an) levels of *mef2ca*, *prdm1*, *ptc1*, *smyhc1*,  $\alpha$ -*actin* or *tpma* mRNA or fraction of control and *myf5*+*myod* MO embryos with altered *prdm1* mRNA or MyHC IHC.  
Fig. 3C-E, fraction of embryos with abnormal (an), reduced (r) or strongly reduced (sr) *myhz1* or *myog* mRNA levels or MyHC IHC in cranial muscle. \*Siblings (sibs) and *myf5*<sup>hu2022</sup> mutants (mut) were distinguished by somitic MyHC expression.  
Fig. 3F, fraction of non-injected control or *myod* MO-injected embryos from a *myf5*<sup>hu2022</sup> incross with very weak (vw) *myf5* mRNA levels and abnormal (an), delayed (d) or strongly reduced (sr) levels of *hsp90a* or *meox1* mRNA.  
Fig. 4, Fraction of embryos with abnormal (an), weak (w), reduced (r), strongly reduced (sr) or abolished (ab) levels of *myhz1*, *tpma*, *myl2*, *myog* or *mef2d* mRNA or MyHC, slow MyHC or fast MyHC IHC.  
Fig. 5, fraction of embryos with strongly reduced (sr), reduced (r) or abolished (ab) levels of *mrf4*, *myog* or *myhz1* mRNA.  
Fig. 6A, fraction of embryos with strongly reduced (sr), abolished (ab) or normal (n) mRNA levels of *myl2* and *smyhc1*.  
Fig. 6B, fraction of embryos with reduced mRNA levels of *myhz1* or *smyhc1*.  
Fig. 6C, fraction of embryos with reduced (r) or strongly reduced (sr) *acta1*:GFP, Mef2 or slow MyHC (F59) IHC.  
Fig. 6D, fraction of embryos with reduced (r) or strongly reduced (sr) fast MyHC (EB165) IHC.  
Fig. 6E, fraction of embryos injected with *myod* and *myog* MO (1 ng or 2 ng of each MO) with reduced (r) or strongly reduced (sr) mRNA levels of *myhz1*.  
Fig. 7A, Fraction of *myod* MO-injected or uninjected wild type or *myf5*<sup>hu2022</sup> incross embryos treated with CyA or ethanol vehicle with reduced (r) or strongly reduced (sr) or abolished (ab) mRNA levels of *myhz1*. Smu-like (sl) refers to U-shaped somites, as seen in Hh signalling mutants like *smo*.  
Fig. 7B, Fraction of *myod* MO-injected or uninjected wild type or *myf5*<sup>hu2022</sup> incross embryos with very weak (vw), reduced (r) or abolished (ab) mRNA levels of *myf5*, *eng1a* or *eng2a*.  
Fig. 7C, Fraction of *myod* MO-injected or uninjected *Tg(myf5:GFP)* embryos with reduced (r) Engrailed (4D9) IHC.  
Fig. S2C, Fraction of embryos from a *myf5*<sup>hu2022</sup> incross with very weak (vw) *myf5* mRNA levels and abnormal (an) levels of *myod*, *myog*, *mrf4*, *mef2ca*, *pax3*, *prdm1* or *ptc1*.  
Fig. S3B, Fraction of embryos injected with *mrf4* mRNA or *mrf4*<sup>hu2041</sup> mutant mRNA showing ectopic muscle outside the somites (em).
