# Supplementary material
Source: PubMed Central journal article supplement (PMC2687589)

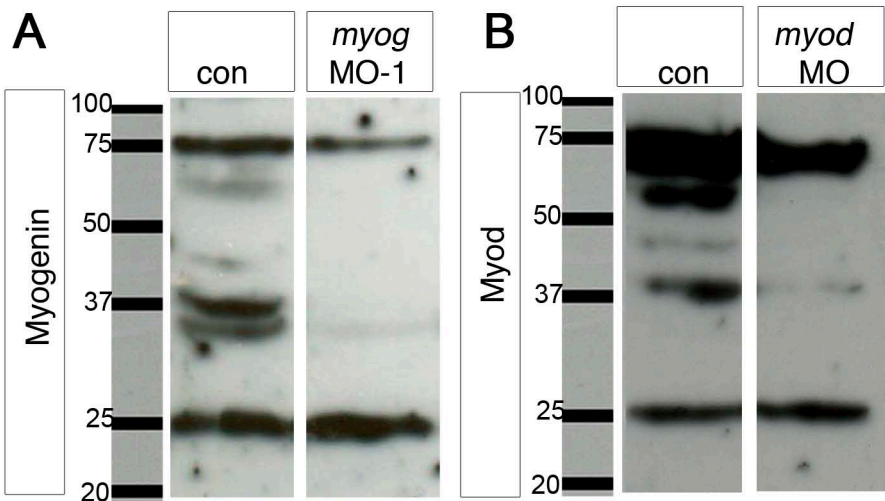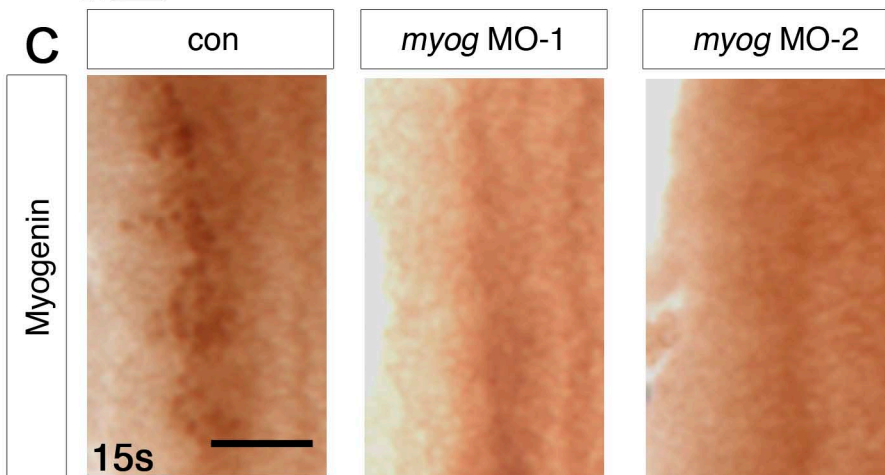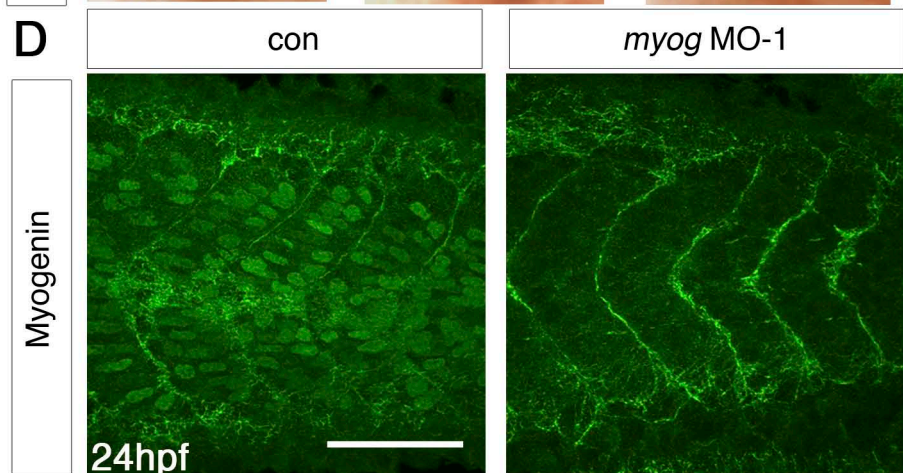

Supplement: supp_136_3_403__1.pdf [file supp_136_3_403__1.pdf]

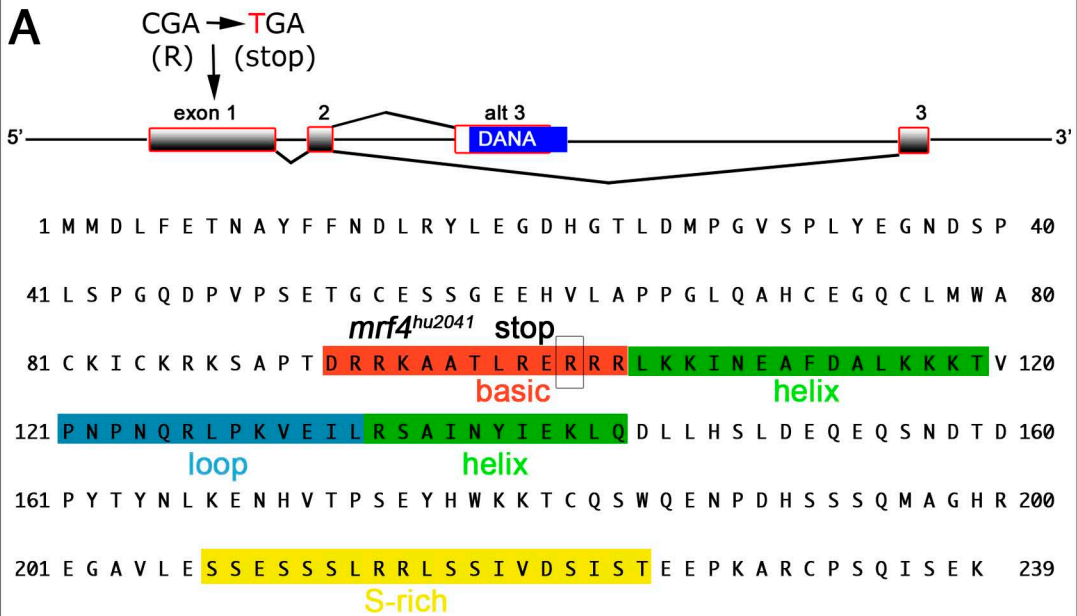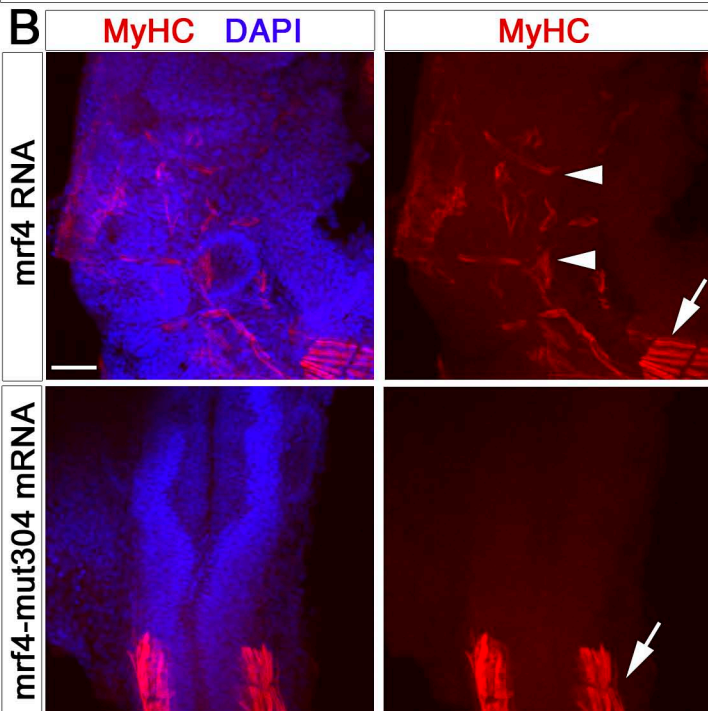

Supplement: supp_136_3_403__3.pdf [file supp_136_3_403__3.pdf]
